# Supplementary material for: Dunaliella Salinas based Sn–carbon anode for high-performance Li-ion batteries
Source: Royal Society of Chemistry journal article supplement (doi:10.1039/d1ra06443f), 2021-01-01
Supplement: d1ra06443f1.pdf [file d1ra06443f1.pdf]

Supporting Information

## Dunaliella Salinas Based Sn-Carbon Anode for High Performance Li-Ion Batteries

Yuhua Yang,<sup>1, 2</sup> Yecheng Dong,<sup>3</sup> Ziwei Zhang,<sup>4</sup> Zhichao Xi,<sup>3</sup> Junhuai Xiang,<sup>1, 2\*</sup> Xiaohua Ouyang,<sup>1</sup> Tingting Wang,<sup>1</sup> Li Qiu,<sup>1</sup> Jun Zhou,<sup>4\*</sup>

<sup>1</sup>School of Materials and mechanical & electrical Engineering, Jiangxi Science and Technology Normal University, Nanchang 330038, P. R. China

<sup>2</sup>Jiangxi Key Laboratory of Surface Engineering, Jiangxi Science and Technology Normal University, Nanchang 330038, P. R. China

<sup>3</sup>Information Engineering School, Nanchang University, Nanchang 330038, P. R. China

<sup>4</sup>School of Communications and Electronics, Jiangxi Science and Technology Normal University, Nanchang 330013, P. R. China

\*Correspondence to (Jun. Zhou and Junhuai xiang): [B12070015@hnu.edu.cn](mailto:B12070015@hnu.edu.cn), +8613767508792.  
[Xiangjunhuai@163.com](mailto:Xiangjunhuai@163.com)

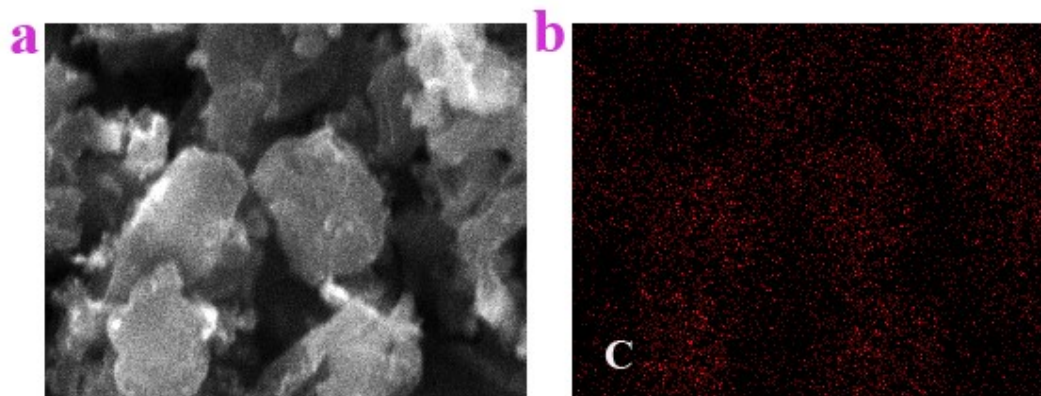

**Supplementary Figure 1: Elemental maps of the C in the sample**

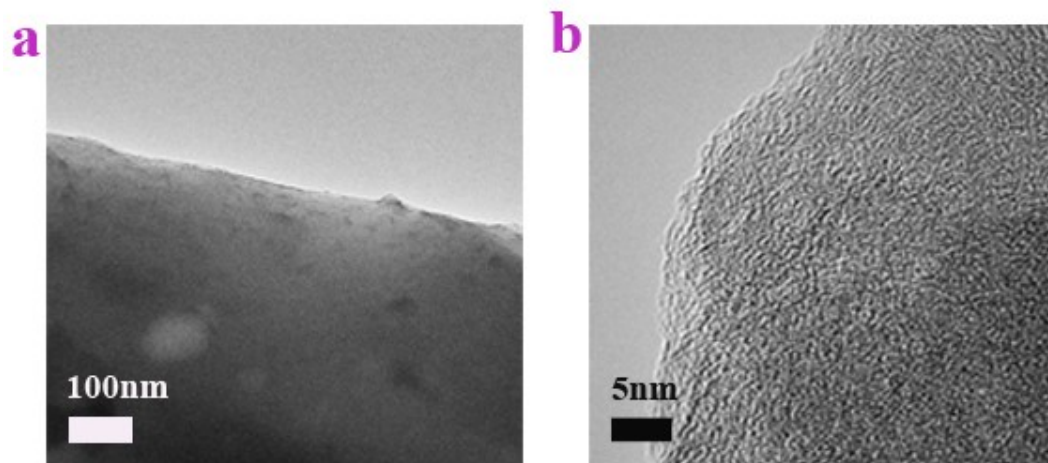

Supplementary Figure 2: TEM image of the amorphous carbon (a) and HRTEM image of the amorphous carbon (b)

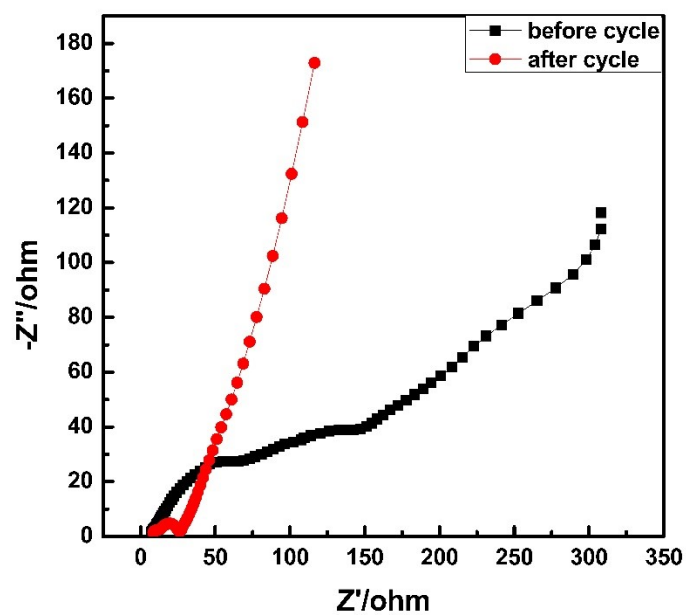

Supplementary Figure 3: The electrochemical impedance spectra (EIS) before discharging (black line) and after 470 cycling (red line) for the Sn-Carbon composite Anode

Supplementary Figure 3 shows the Electrochemical Impedance Spectroscopy (EIS) of the Sn-

Carbon composite Anode before discharging and after 470 cycling. The radius of curvature of the Sn-Carbon composite in the high and medium frequency region before discharging ( $125 \Omega$ ) is far bigger than the corresponding data after 470 cycling ( $25 \Omega$ ), implying the low meliorative internal resistance with the activation of anode after 470 cycling.

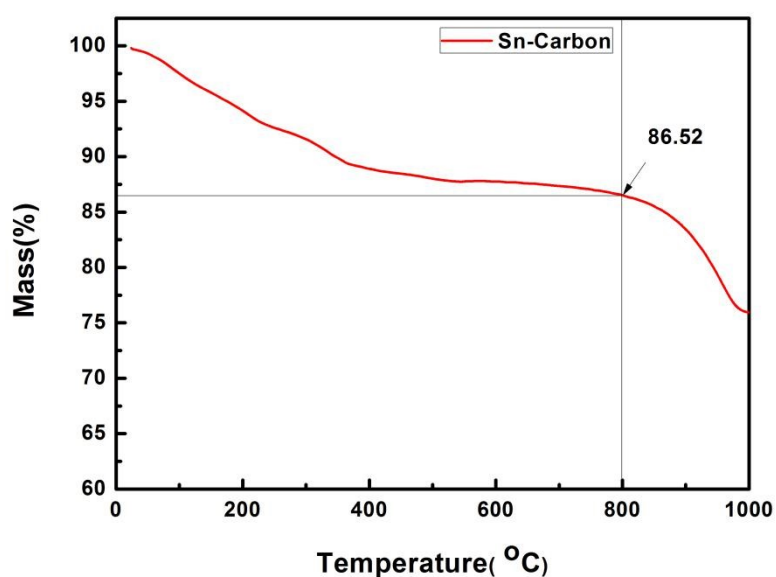

**Supplementary Figure 4: TGA data of the Sn-Carbon composite.**

**Supplementary Figure 4** shows the TGA data of the Sn-Carbon composite, under the 350 °C, the weight of Sn-Carbon composite decreases constantly and fleetly, it mainly due to the loss of C; during the 350-800 °C, its weight decreases slowly, it means that the carbon is almost gone. After 800 °C, it loses its weight sharply, it dues to the change of Sn mainly.

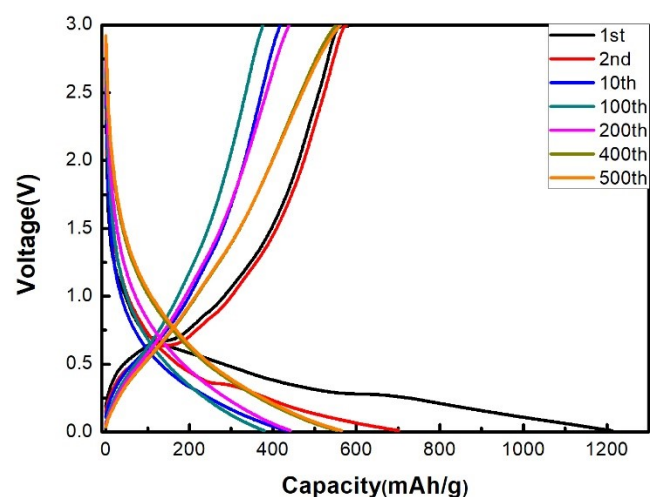

**Supplementary Figure 5: Charge/discharge curves at a current density of  $1000 \text{ mA g}^{-1}$  at the 1<sup>st</sup>, 2<sup>nd</sup>, 10<sup>th</sup>, 100<sup>th</sup>, 200<sup>th</sup>, 400<sup>th</sup>, 500<sup>th</sup> cycles.**

**Supplementary Figure 5** displays that the 400<sup>th</sup> and 500<sup>th</sup> Charge/discharge curves coincide very well, and they are in high specific capacities. The 1<sup>st</sup>, 2<sup>nd</sup>, 10<sup>th</sup> specific capacities present a gradual decrease, the 100<sup>th</sup>, 200<sup>th</sup>, 400<sup>th</sup> specific capacities present gradual increase, which evidences the activation phenomenon and the specific capacities have a decrease in the first stage, a succedent increase in the second stage in capacity while cycling.

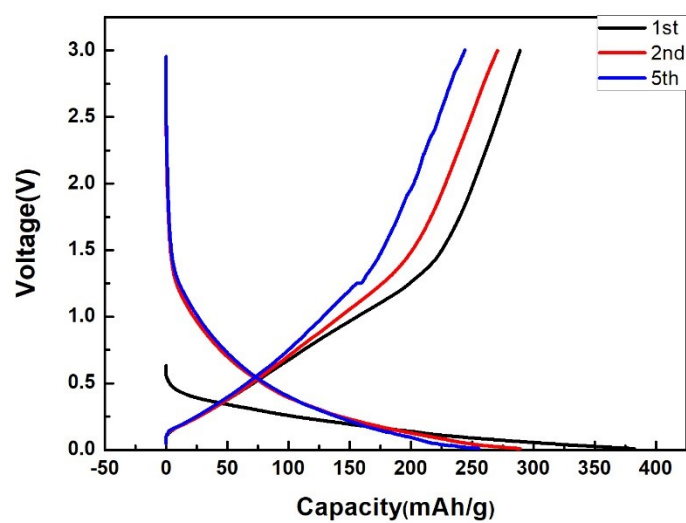

**Supplementary Figure 6:** The Charge/discharge curves of amorphous carbon at a current density of  $100 \text{ mA g}^{-1}$  at the 1<sup>st</sup>, 2<sup>nd</sup>, 5<sup>th</sup> cycles.
